# Supplementary material for: Identifying the key biophysical drivers, connectivity outcomes, and metapopulation consequences of larval dispersal in the sea
Source: PubMed Central journal article supplement (PMC4502943; doi:10.1186/s40462-015-0045-6), 2015-07-15
Supplement: 40462_2015_45_MOESM2_ESM.pdf [file 40462_2015_45_MOESM2_ESM.pdf]

1

**Additional File 2**

2

**Supplemental materials for**

3

**Identifying the key biophysical drivers, connectivity outcomes, and metapopulation**

4

**consequences of larval dispersal in the sea**

5

Eric A Treml<sup>1\*</sup>, John R Ford<sup>1</sup>, Kerry P Black<sup>1</sup>, Stephen E Swearer<sup>1</sup>

6

1. School of BioSciences, University of Melbourne, Parkville, Victoria 3010, Australia.

7

8

9 **Table S1.** Median values for all reef-based response variables are reported per reef patch and summarized across all reefs in system (All),  
 10 aggregated across all behavioural parameters. Lower and upper quartile values are also shown (Q1 - Q3).

11

| <b>Parameter</b> | <b>Reef 3</b>          | <b>Reef 10</b>         | <b>Reef 12</b>         | <b>Reef 16</b>         | <b>Reef 18</b>         | <b>Reef 23</b>         | <b>Reef 26</b>         | <b>Reef 32</b>         | <b>All</b>             |
|------------------|------------------------|------------------------|------------------------|------------------------|------------------------|------------------------|------------------------|------------------------|------------------------|
| <b>LR</b>        | 0.001<br>(0.000-0.070) | 0.003<br>(0.000-0.142) | 0.000<br>(0.000-0.043) | 0.001<br>(0.000-0.062) | 0.000<br>(0.000-0.097) | 0.004<br>(0.000-0.204) | 0.000<br>(0.000-0.015) | 0.001<br>(0.000-0.170) | 0.000<br>(0.000-0.110) |
| <b>SR</b>        | 0.303<br>(0.000-0.988) | 0.238<br>(0.000-1.000) | 0.005<br>(0.000-1.000) | 0.988<br>(0.000-1.000) | 0.166<br>(0.000-1.000) | 0.480<br>(0.000-1.000) | 0.041<br>(0.000-1.000) | 1.000<br>(0.000-1.000) | 0.287<br>(0.000-1.000) |
| <b>H</b>         | 0.896<br>(0.000-1.736) | 0.736<br>(0.000-1.630) | 0.546<br>(0.000-1.738) | 0.000<br>(0.000-1.267) | 0.751<br>(0.000-1.753) | 0.765<br>(0.000-1.676) | 0.580<br>(0.000-1.614) | 0.000<br>(0.000-0.663) | 0.499<br>(0.000-1.676) |
| <b>mdG</b>       | 0.409<br>(0.014-1.189) | 0.400<br>(0.037-0.795) | 0.800<br>(0.206-1.266) | 0.059<br>(0.043-1.026) | 0.839<br>(0.016-1.273) | 0.212<br>(0.013-1.228) | 0.651<br>(0.228-1.571) | 0.211<br>(0.010-1.166) | 0.459<br>(0.016-1.266) |
| <b>mxG</b>       | 0.780<br>(0.086-1.000) | 0.488<br>(0.124-1.000) | 0.940<br>(0.392-1.000) | 0.821<br>(0.047-1.000) | 0.937<br>(0.011-1.000) | 0.684<br>(0.109-1.000) | 0.845<br>(0.330-1.000) | 0.844<br>(0.386-1.000) | 0.805<br>(0.109-1.000) |
| <b>S</b>         | 0.050<br>(0.000-0.427) | 0.046<br>(0.000-0.423) | 0.053<br>(0.000-0.470) | 0.071<br>(0.001-0.510) | 0.032<br>(0.000-0.367) | 0.036<br>(0.000-0.377) | 0.044<br>(0.000-0.452) | 0.021<br>(0.000-0.204) | 0.042<br>(0.000-0.412) |
| <b>dC</b>        | 0.176<br>(0.000-0.618) | 0.176<br>(0.000-0.618) | 0.147<br>(0.000-0.618) | 0.147<br>(0.000-0.500) | 0.206<br>(0.000-0.647) | 0.147<br>(0.000-0.706) | 0.176<br>(0.000-0.735) | 0.235<br>(0.000-0.588) | 0.176<br>(0.000-0.647) |
| <b>Cw</b>        | 0.102<br>(0.000-0.330) | 0.100<br>(0.000-0.320) | 0.100<br>(0.000-0.330) | 0.111<br>(0.000-0.337) | 0.088<br>(0.000-0.334) | 0.092<br>(0.000-0.330) | 0.103<br>(0.000-0.360) | 0.075<br>(0.000-0.286) | 0.096<br>(0.000-0.330) |

12
